# Supplementary material for: Inhibition of the Early-Stage Cross-Amyloid Aggregation of Amyloid-β and IAPP via EGCG: Insights from Molecular Dynamics Simulations
Source: PubMed Central journal article supplement — ACS Omega. 2024 Jul 3;9(28):30256–69. doi: 10.1021/acsomega.4c00500 (PMC11256295; doi:10.1021/acsomega.4c00500), 2024-07-03
Supplement: ao4c00500_si_001.pdf [file ao4c00500_si_001.pdf]

# Supplementary Information for Inhibition of the early-stage cross-amyloid aggregation of amyloid- $\beta$ and IAPP via EGCG: insights from molecular dynamics simulations

Amit Srivastava,<sup>†</sup> Kenana Al Adem,<sup>‡,¶</sup> Aya Shanti,<sup>§</sup> Sungmun Lee,<sup>||,⊥</sup> Sufian  
Abedrabbo,<sup>†</sup> and Dirar Homouz<sup>\*,†</sup>

<sup>†</sup>*Department of Physics, Khalifa University of Science and Technology, Abu Dhabi, UAE*

<sup>‡</sup>*Chair of Biological Imaging, Central Institute for Translational Cancer Research  
(TranslaTUM), School of Medicine, Technical University of Munich, Munich, Germany.*

<sup>¶</sup>*Institute of Biological and Medical Imaging, Helmholtz Zentrum München, Neuherberg,  
Germany.*

<sup>§</sup>*Department of Biology, Khalifa University of Science and Technology, Abu Dhabi, UAE*

<sup>||</sup>*Department of Biomedical Engineering and Healthcare Engineering Innovation Center,  
Khalifa University of Science and Technology, Abu Dhabi, UAE*

<sup>⊥</sup>*Khalifa University's Center for Biotechnology, Khalifa University of Science and  
Technology, Abu Dhabi, UAE*

E-mail: dirar.homouz@ku.ac.ae

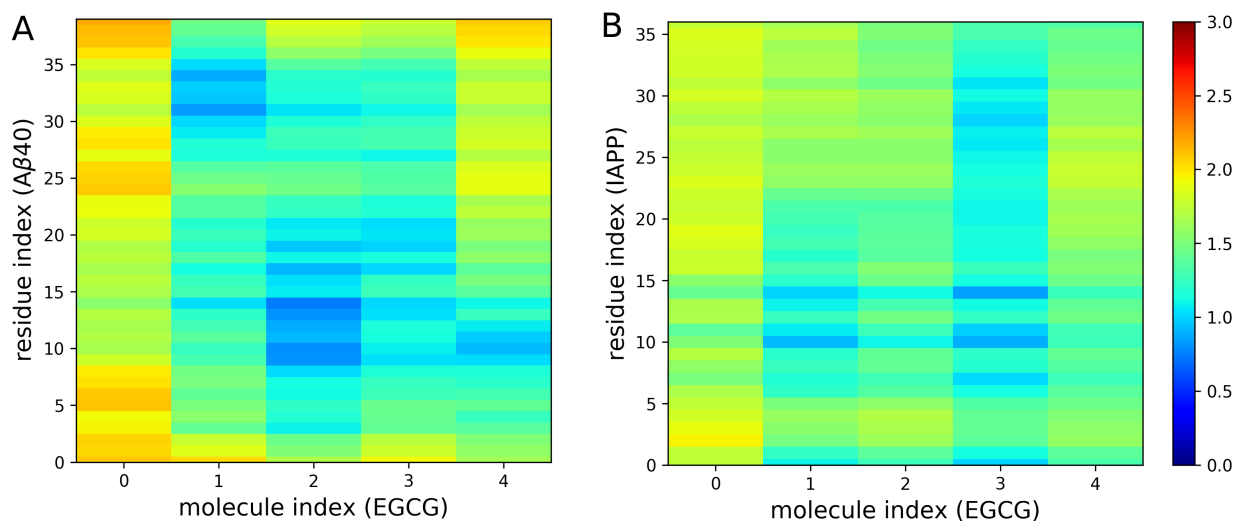

Figure S1: The distance matrices illustrating inter-molecular contacts between EGCG molecule and A $\beta$ 40 (**A**), and IAPP and (**B**). The inter-molecular contacts are shown for the whole simulation time. The color bar on the right indicates average inter-molecular distances (in nanometers)

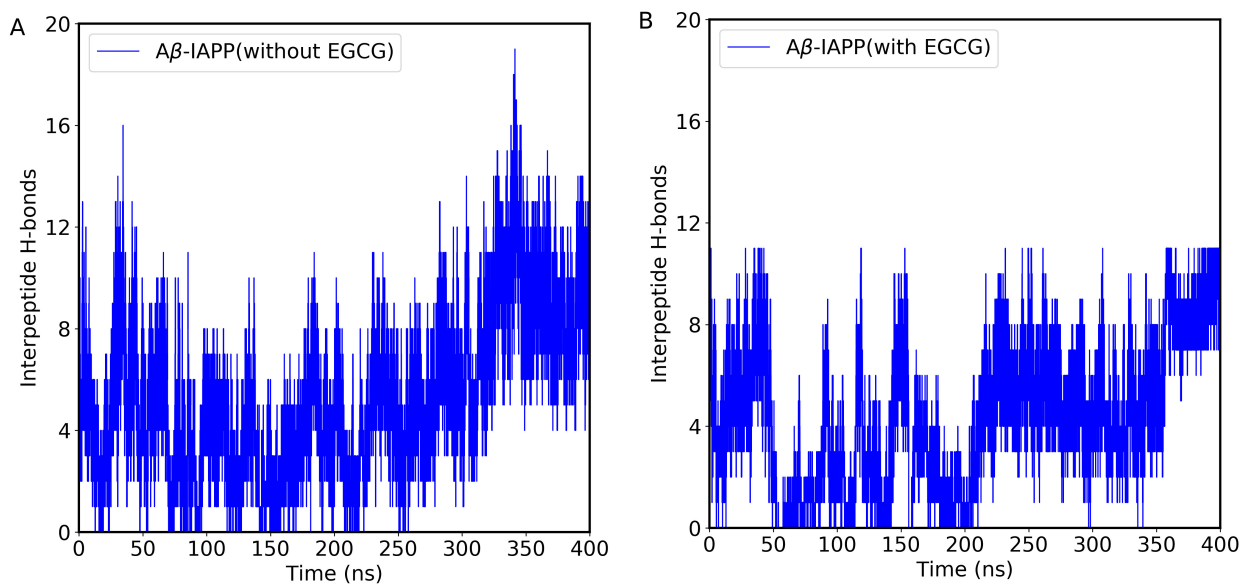

Figure S2: Time evolution of inter-peptide hydrogen bonds formed between A $\beta$ 40 and IAPP (**A**) in the absence of EGCG (**B**) in the presence of EGCG of hetero-dimer system.

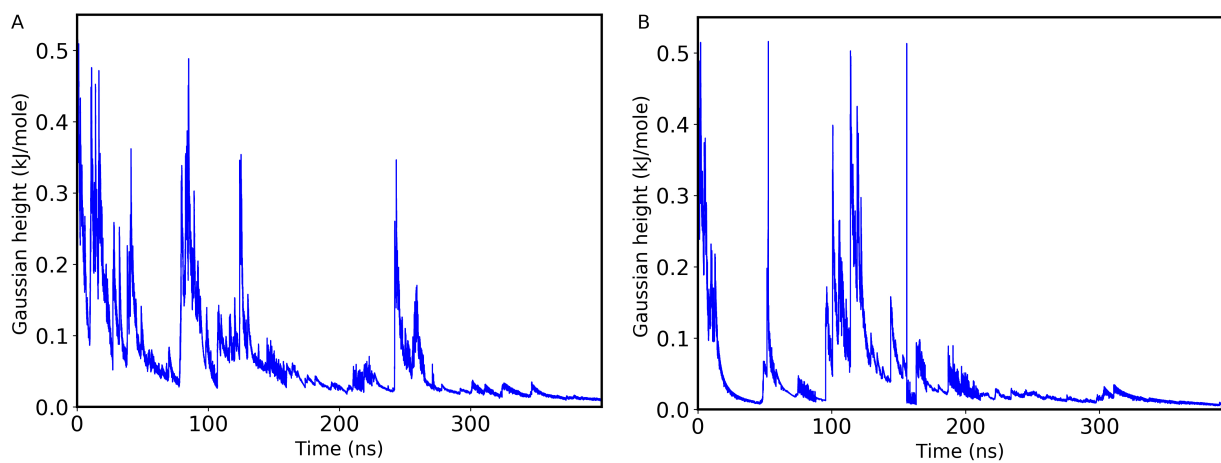

Figure S3: Time evolution of Gaussian hills of heterodimer system during the metadynamics simulation (**A**) in the absence of EGCG, and (**B**) in the presence of EGCG.
